# 1 **Predicting Mental and Neurological Illnesses Based on Cerebellar Normative Features**

2 Milin Kim<sup>1,2</sup>, Nitin Sharma<sup>8,9</sup>, Esten H. Leonardsen<sup>1,2</sup>, Saige Rutherford<sup>5,6,7</sup>, Geir Selbæk<sup>10,11,22</sup>,  
3 Karin Persson<sup>10,11</sup>, Nils Eiel Steen<sup>1,12,13</sup>, Olav B. Smeland<sup>1</sup>, Torill Ueland<sup>2,12</sup>, Geneviève  
4 Richard<sup>1</sup>, Aikaterina Manoli<sup>16</sup>, Sofie L. Valk<sup>16, 17,18</sup>, Dag Alnæs<sup>1,2</sup>, Christian F. Beckman<sup>6,21</sup>,  
5 Andre F. Marquand<sup>6,20</sup>, Ole A. Andreassen<sup>1,3</sup>, Lars T. Westlye<sup>1,2,3</sup>, Thomas Wolfers<sup>1,8,9</sup> \*\* &  
6 Torgeir Moberget<sup>1,4,19</sup> \*\*.

7

## 8 **Affiliations:**

9 <sup>1</sup> Centre for Precision Psychiatry, Division of Mental Health and Addiction, University of Oslo  
10 and Oslo University Hospital, Oslo, Norway; <sup>2</sup> Department of Psychology, University of Oslo,  
11 Oslo, Norway; <sup>3</sup> KG Jebsen Centre for Neurodevelopmental Disorders, University of Oslo,  
12 Oslo, Norway; <sup>4</sup>Department of Behavioral Science, School of Health Sciences, Oslo  
13 Metropolitan University - OsloMet, Oslo, Norway; <sup>5</sup> Department of Cognitive Neuroscience,  
14 Radboud University Medical Centre, Nijmegen, Netherlands; <sup>6</sup>Donders Institute, Radboud  
15 University, Nijmegen, Netherlands; <sup>7</sup>Department of Psychiatry, University of Michigan, Ann  
16 Arbor, MI, United States; <sup>8</sup>Department of Psychiatry and Psychotherapy, University of  
17 Tübingen, Tübingen, Germany; <sup>9</sup>German Center for Mental Health (DZPG), Tübingen,  
18 Germany; <sup>10</sup>Department of Geriatric Medicine, Oslo University Hospital, Oslo, Norway; <sup>11</sup>The  
19 Norwegian National Centre for Ageing and Health, Vestfold Hospital Trust, Tønsberg, Norway;  
20 <sup>12</sup>Section for Clinical Psychosis Research, Division of Mental Health and Addiction, Oslo  
21 University Hospital, Oslo, Norway; <sup>13</sup>Division of Mental Health and Substance Abuse,  
22 Diakonhjemmet Hospital, Oslo, Norway; <sup>14</sup>Department of Neuroimaging, Centre of  
23 Neuroimaging Sciences, Institute of Psychiatry, King's College London, London, UK; <sup>15</sup>Centre  
24 for Functional MRI of the Brain, Nuffield Department of Clinical Neurosciences, Wellcome  
25 Centre for Integrative Neuroimaging, University of Oxford, Oxford, UK, <sup>16</sup>Otto Hahn Research

**NOTE: This preprint reports new research that has not been certified by peer review and should not be used to guide clinical practice.**

26 Group for Cognitive Neurogenetics, Max Planck Institute for Human Cognitive and Brain  
27 Sciences, Leipzig, Germany; <sup>17</sup>Institute of Neurosciences and Medicine (INM-7), Research  
28 Centre Jülich, Jülich, Germany; <sup>18</sup>Institute of Systems Neuroscience, Heinrich Heine  
29 University Düsseldorf, Düsseldorf, Germany; <sup>19</sup>Department of Psychology, Pedagogy and Law,  
30 School of Health Sciences, Kristiania University College, Oslo, Norway, <sup>20</sup>Department of  
31 Neuroimaging, Centre of Neuroimaging Sciences, Institute of Psychiatry, King's College  
32 London, London, UK, <sup>21</sup>Centre for Functional MRI of the Brain, Nuffield Department of  
33 Clinical Neurosciences, Wellcome Centre for Integrative Neuroimaging, University of Oxford,  
34 Oxford, UK; <sup>22</sup>Institute for clinical medicine, University of Oslo, Oslo, Norway

35

36 \*\*These authors contributed equally.

37

### 38 **Corresponding authors**

39 Milin Kim, Centre for Precision Psychiatry, University of Oslo and Oslo University Hospital,  
40 Oslo, Norway, E-mail:

41 [milink@student.sv.uio.no](mailto:milink@student.sv.uio.no)

42

43

44

45

46

47

48

49

50

51 **Abstract**

52 Mental and neurological conditions have been linked to structural brain variations. However,  
53 aside from dementia, the value of brain structural characteristics derived from brain scans for  
54 prediction is relatively low. One reason for this limitation is the clinical and biological  
55 heterogeneity inherent to such conditions. Recent studies have implicated aberrations in the  
56 cerebellum – a relatively understudied brain region – in these clinical conditions. Here, we used  
57 machine learning to test the value of individual deviations from normative cerebellar  
58 development across the lifespan (based on trained data from >27k participants) for prediction  
59 of autism spectrum disorder (ASD) (n=317), bipolar disorder (BD) (n=238), schizophrenia (SZ)  
60 (n=195), mild cognitive impairment (MCI) (n=122), and Alzheimer's disease (AD) (n=116).  
61 We applied several atlases and derived median, variance, and percentages of extreme  
62 deviations within each region of interest. Our results show that lobular and voxel-wise  
63 cerebellar data can be used to discriminate healthy controls from ASD and SZ with moderate  
64 accuracy (the area under the receiver operating characteristic curves ranged from 0.56 to 0.64),  
65 The strongest contributions to these predictive models were from posterior regions of the  
66 cerebellum, which are more strongly linked to higher cognitive functions than to motor control.

67

68 **Keywords:** Cerebellum, Normative modelling, Magnetic Resonance Imaging, Mental  
69 Illnesses, & Neurological Diseases, Machine Learning

70

71

72

73

74

75

## 76 **Introduction**

77 Clinical heterogeneity and complex pathobiological mechanisms impede the discovery of  
78 reliable biomarkers for many neurological and – especially – psychiatric disorders, thereby  
79 complicating precise clinical decision-making and treatments. Over the last two decades, there  
80 has been a trend in the development of neuroimaging-based tools and machine learning for  
81 prognosis and diagnosis of psychiatric disorders (1,2) and neurological illnesses (3).  
82 Neuroimaging-based prediction studies on autism spectrum disorder (ASD), bipolar disorder  
83 (BD), and schizophrenia (SZ) have reported a wide range of accuracies, underscoring the  
84 limitations associated with small samples, including poor generalization performance (4,5). Of  
85 note, prediction studies on dementias show greater promise for clinical usage in both  
86 Alzheimer’s disease (AD) (3) and mild cognitive impairment (MCI).

87 Notably, the majority of these prediction studies (4–6) have focused on cerebral  
88 features, perhaps reflecting a “cortico-centric bias” in the literature (7). Nonetheless,  
89 disruptions in the cerebellum have been hypothesized to contribute to various clinical  
90 conditions, such as childhood psychiatric symptoms (8), AD (9), SZ (10), and ASD (11–13).  
91 Indeed, patient studies have shown that abnormalities in cerebellum can exert a significant  
92 influence on motor, cognitive, and emotional functions (14–16), yet, there is little exploration  
93 on the role of the cerebellum in predicting and classifying mental and neurological illnesses.  
94 Using a normative modelling approach, we recently demonstrated significant deviations from  
95 normal cerebellar developmental across the lifespan in ASD, MCI, AD, BD, and SZ (17).  
96 While these individual-level deviations revealed substantial cerebellar heterogeneity among  
97 individuals with the same disorder, the value of these cerebellar features with respect to  
98 classifying these disorders remain uncertain.

99 In this study, we addressed this gap by performing a set of predictions of ASD, MCI,  
100 AD, BD, and SZ, using MRI-based cerebellar features and cross-validated machine learning

101 classifiers. We applied lobular and voxel-wise normative models (17) and aggregated the  
102 median, variance and percentage of extreme deviations across atlases (18,19). Finally, for  
103 models that were able to meaningfully differentiate between patients and health controls, we  
104 identified cerebellar regions that contributed the most to the prediction.

105

## 106 **Methods**

### 107 *Sample*

108 The study consisted of healthy controls from the test set the cerebellar lifespan normative  
109 model (17) (n=26.985, 53% females), and the clinical samples (n=1.757, 30% females) (Figure  
110 1A and Supplementary Table 2). Individuals without diagnoses were matched to the clinical  
111 datasets of patients with AD, ASD, BD, MCI, and SZ (Table 1) using nearest neighbor  
112 matching based on exact matches of sex and scanning site with age as implemented in *MatchIt*  
113 (20). The clinical datasets were obtained from the ABIDE, ADNI, AIBL, DEMGEN, and TOP  
114 cohorts. Information about each cohort and studies can be found in the corresponding  
115 publications (Supplementary Table 1). If participants were scanned at several timepoints, only  
116 baseline scans were chosen for this study. Individuals who withdrew from the studies or lacked  
117 essential demographic information and T1-weighted MRI data were excluded from the  
118 analyses.

119

### 120 *Lobular-level processing*

121 The T1-weighted images were skull-stripped using the FreeSurfer 5.3 auto-recon pipeline (21)  
122 and reoriented to the standard FSL orientation using the *fslreorient2std* (22). Linear registration  
123 was performed using *flirt* (23), which employed linear interpolation (with six degrees of  
124 freedom) and the default 1 mm FSL template (version 6.0). The borders were cropped at  
125 coordinates [6:173, 2:214, 0:160] to minimize their size without removing brain tissue. Finally,

126 the voxel intensity values of all brain images were normalized to the range of [0,1], adjusting  
127 the intensity values of each voxel to a standardized scale.

128 To segment the cerebellum, we utilized the ACAPULCO algorithm (24), part of  
129 ENIGMA Cerebellum Volumetric Pipeline, which is a cerebellum parcellation algorithm based  
130 on convolutional neural networks. This algorithm delivers fast and precise quantitative in-vivo  
131 regional assessment of the cerebellum. As part of the algorithm, the images were corrected for  
132 inhomogeneity by N4 correction method (25) and registered to the 1mm isotropic ICBM 2009c  
133 template in MNI space using the ANTs registration suite (26). The ACAPULCO algorithm is  
134 based on 15 expert manual delineations of an adult cohort (27). It achieves per-voxel labelling  
135 and employs post-processing of the parcellation to correct for mislabeling and for accurate  
136 segmentation. ACAPULCO segments the cerebellum into 28 cerebellar lobules and computes  
137 the volume ( $\text{mm}^3$ ) for each region. These regions include bilateral Lobules I–VI; Crus I and II;  
138 Lobules VIIIB, VIIIA, VIIIB, and IX-X; Vermis VI, VII, VIII, IX, and X; and Corpus Medullare  
139 (CM). To ensure data quality, participants with extreme outliers (2.698 s.d. above or below the  
140 mean) (28) in more than two lobules based on automated quality control measures, were  
141 excluded. We set the threshold at two lobules because the differences between one and two  
142 lobules was not significant (see Supplementary Methods for detailed information for quality  
143 control).

144

#### 145 *Voxel-level processing*

146 We used SUI version 3.4 (Spatially Unbiased Infratentorial Toolbox) (29) to segment  
147 cerebellar grey and white matter voxel-based morphometry (VBM) maps. SUI leverages the  
148 outputs from ACAPULCO, an MNI-aligned T1 image (29,30), and an average mask derived  
149 from a randomly selected group of 300 individuals without a diagnosis. After segmentation,  
150 the grey matter maps were normalized for standardized comparison and re-sliced to align them

151 with the MNI152 template. Additionally, the grey matter maps were modulated by the Jacobian  
152 to preserve the value of each voxel in proportion to its original volume. This Jacobian  
153 modulation ensured that the values of the original volume were proportionally maintained.

154

#### 155 *Normative modelling*

156 We used a publicly available cerebellar normative model, estimated using >27  
157 participants (17) which is implemented in the PCNtoolkit package (version 0.24) (31,32). This  
158 normative model encompasses cerebellar volumes and voxel-wise intensity while including  
159 sex, age, and scanning-site as covariates (Figure 1B).

160 To analyze the data, we employed Bayesian Linear Regression (BLR) with the  
161 likelihood warping method (33), incorporating the 'sinarcsinsh' transformation (34,35), to  
162 handle non-linear basis functions and non-Gaussian predictive distributions for large datasets  
163 (34). Scanning-site was accounted for as a fixed effect (36,37). The normative model provides  
164 point estimates and evaluation metrics such as explained variance, mean squared log-loss, skew,  
165 and kurtosis (35). These evaluation metrics were calculated in the test set, which did not include  
166 clinical cohorts. Extreme deviations were defined as  $|z| > 1.96$ , corresponding to the most  
167 extreme 5% of cases in both directions in the reference cohort.

168

#### 169 *Feature engineering*

170 Voxel-wise normative models were utilized to map deviation profiles onto existing  
171 atlases (see Supplementary Methods). Three existing atlases were selected: 28 cerebellar  
172 anatomical regions, 10 regions of interest (ROI) from the multi-domain task battery (MDTB)  
173 (19), and 17 ROI from resting-state connectivity (18,38). For each region of interest delineated  
174 by these atlases, we computed three key statistics: the median, variance and percentage of  
175 extreme deviations (Figure 1C). To quantify the extremes in deviation, we also calculated the

176 proportion of voxel-wise deviations that exceeded the established threshold of  $|z| > 1.96$ ,  
177 denoting both extreme positive and negative deviations. This proportion was determined by  
178 dividing the count of such extreme deviations by the total voxel count within the corresponding  
179 region of interest. Variance has previously been used to examine the structural heterogeneity  
180 among patients in SZ (39,40). Unlike percentage of extreme deviation ( $|z| > 1.96$ ) that has been  
181 used in past normative studies (41–43), variance assesses the dispersion within the region,  
182 capturing the regionally heterogeneous spread within patients.

183

#### 184 *Model training and evaluation*

185 Machine learning models employing logistic regression (LR) were used to build prediction  
186 models (Figure 1D). In addition, results from the random forest (RF) algorithm from the scikit-  
187 learn library version 1.2.2 (44) and the eXtreme Gradient Boosting (XGBoost) library version  
188 1.7.3 (45) can be found in the Supplementary Figure 3. RF is a non-parametric supervised  
189 learning method that addresses over-fitting by combining decision trees into a single outcome,  
190 effectively balancing the bias-variance trade-off. XGBoost is an open source library to  
191 implement advanced gradient boosting algorithms (45).

192 The features engineered from three atlases separately ran as inputs for the algorithm.  
193 We developed various machine learning models using deviations from the normative models  
194 and utilized their median, variance and percentage of extreme deviation onto the existing  
195 atlases as features. To evaluate the model's performance in held-out test data, we conducted a  
196 stratified five-fold cross-validation and used the area under the receiver operating characteristic  
197 curve (AUROC) as the primary performance metric. Additionally, we calculated precision,  
198 recall, sensitivity, specificity, balanced accuracy, and the area under the precision-recall curve.

199

#### 200 *Permutation testing*



201 We used permutation testing to assess whether the AUROCs achieved by our model was  
202 different from chance level performance. To achieve this, we shuffled the diagnosis labels  
203 randomly 1000 times, for each permutation calculating an AUROC. For significance testing,  
204 the original AUROC was compared to the distribution of permuted AUROC values. If the  
205 original AUROC falls within the extreme ends of the permutation distribution ( $p < 0.05$ ), it is  
206 considered statistically significant. We applied an identical approach for the lobular volume  
207 features. The comparison between models utilized an approach similar to that outlined in  
208 Supplementary Figure 2-3, wherein the previously calculated shuffled AUROC values were  
209 used. We calculated the difference in true AUROC scores, as well as the AUROC differences  
210 from 1000 permuted datasets, between the two models. Subsequently, we compared the true  
211 score and the permuted scores to assess statistical significance.

212

### 213 *Feature importance ranking*

214 We assessed feature importance based on logistic regression coefficients to highlight their  
215 influence on the predictions. The coefficients from the model directly infer the relative  
216 importance of each feature, thus facilitating interpretation. The magnitude of the coefficient  
217 indicates the strength of the effect a feature has on the prediction, while the sign (positive or  
218 negative) indicates the direction of the effect. Figure 3 illustrates the summary plot of the  
219 standardized feature importance, emphasizing the key features that have the greatest influence  
220 (see Supplementary Figure 1 for all feature importance).

221

## 222 **Results**

223

224 We conducted a comprehensive analysis at the lobular and voxel-wise level employing  
225 a variety of models (Figure 1C). The voxel-wise model calculations included variance, median,

226 and percentage of deviations across 143k voxels, organized into 28 ROIs for the anatomical  
227 atlas, 10 ROIs for the task-based atlas, and 17 ROIs for the resting-state atlas.

228 Permutation testing revealed significant predictions for ASD and SZ (AUROC values  
229 ranging from 0.56 to 0.64), using various models based on deviations from the cerebellar  
230 normative model (Figure 2). Prediction performance for MCI, AD and BD were not above  
231 chance levels. For SZ, the most predictive models were those centered around median and  
232 variance measures summarized within ROIs for the voxel-wise models. In contrast, for ASD,  
233 models based on the lobular volumes and voxel-wise variance within ROIs were found to be  
234 the most predictive. No notable differences between models based on different parcellations  
235 were found (Supplementary Figure 2). Furthermore, AUROC scores from RF predictions  
236 showed similar patterns of the logistic regression, underscoring the consistency of these  
237 techniques (Supplementary Figure 3).

238 Figure 3 presents the feature importance weights in a logistic regression model used to  
239 analyze SZ and ASD. In SZ, significant negative deviation percentages were found in the  
240 vermis IX and Left IV regions. In task-based functional areas, regions associated with verbal  
241 fluency, word comprehension and mental arithmetic (region 9) and autobiographical recall,  
242 visual letter recognition, interference resolution (region 10) were notable. From the resting-  
243 state atlas, limbic A (region 10) and somatomotor A (region 3) emerged as important. For  
244 median in SZ, the anatomical regions Right I-III and vermis VIII were highlighted. Using task-  
245 based atlases, the top predictive regions were functionality linked to divided attention (region  
246 5) and right-hand movement (region 2). Predictive models using an atlas based on resting-state  
247 atlas highlighted Visual B (region 2) and limbic A (region 10).

248 In ASD, predictive models based on variance (summarized within ROIs) revealed the  
249 most significant contributions from posterior cerebellar regions of Left VIIB and Left Crus II  
250 while models based on lobular volumes features point to Right VI and Left Crus II. Using the

251 task-based functional atlas, the most predictive regions were functionally linked to narrative,  
252 emotion, language processing (region 7) and right-hand movement, motor planning, divided  
253 attention (region 2). Complementary insights and detailed rankings of feature importance are  
254 available in Supplementary Tables 3-7.

255

## 256 **Discussion**

257 This study aimed to test the predictive power of deviations from normal cerebellar  
258 anatomy with respect to classifying mental and neurological disorders and yielded two main  
259 findings. First, we demonstrated that cerebellar features offer moderate power for prediction  
260 for ASD and SZ but did not reliably distinguish healthy controls from patients with BD, MCI  
261 or AD. Second, feature importance analyses showed that posterior regions of the cerebellum,  
262 known for its contributions in cognitive processes (15) were the most important predictors of  
263 ASD and SZ.

264 Our study reveals that features derived from lobular and voxel-wise normative model  
265 possess moderate predictive capabilities in ASD and SZ. This is in line with our previous study  
266 which reported small to medium case-control differences in normative cerebellar anatomy for  
267 both ASD and SZ (17). However, it is worth mentioning that the current analysis considering  
268 cerebellar features only yielded a moderate level of prediction accuracy. Including other key  
269 brain regions and employing a multimodal approach that integrates different types of brain  
270 imaging data may improve the prediction (46,47).

271 Feature importance analysis for the prediction of SZ highlighted contributions from  
272 both motor (48,49) and cognitive regions (15). The limbic vermis, specifically Vermis IX, a  
273 region with reported reductions in individuals with SZ (50–52), displayed the highest feature  
274 importance in percentage of extreme negative deviations when using the anatomical atlas. This  
275 may be interpreted in the context of limbic vermis's role in emotional processing, facial

276 expression recognition (53,54), and mentalizing, which is integral to understanding others'  
277 mental states, also known as theory of mind (55,56). The involvement of the limbic vermis in  
278 these processes is supported by evidence showing connections from this cerebellar region to  
279 both cortical and subcortical limbic areas (57). A small study showed smaller inferior posterior  
280 lobe in children and adolescents with childhood-onset SZ compared to healthy controls (51),  
281 yet, contrasting findings indicate abnormalities may also exist in the anterior lobe (58). A recent  
282 study examining a series of 17 individuals with SZ or undifferentiated psychosis (59) showed  
283 posterior vermis-predominant cerebellar hypoplasia.

284 As functional topography does not consistently adhere to anatomical boundaries in the  
285 cerebellum, we also examined task-based and resting state atlases. In general, there were both  
286 slight discrepancies and shared areas when identifying the features of highest importance  
287 across models based on different atlases. Indeed, no one atlas consistently emerged as better  
288 than any other. However, we believe that moving between atlases significantly aids in  
289 functional interpretation of our findings. For instance, when using the percentage of extreme  
290 negative deviations (summarized within ROIs) to predict SZ, cerebellar regions functionally  
291 linked to verbal fluency, word comprehension and mental arithmetic (region 9) and limbic A  
292 (region 10) exhibited the highest feature importance. And when examining vermis IX in the  
293 task-based atlas, it highlights the region of saccades, visual working memory and visual letter  
294 recognition (19). Past studies literatures exhibit strong resting-state connectivity between  
295 lobules I-VI and vermis VIIB-IX of the cerebellum and the visual network (60), and  
296 oculomotor abnormalities are observed in SZ (61). For median, Right I-III showed the highest  
297 feature importance in the anatomical regions followed by vermis VIII. On the other hand, a  
298 study investigating functional connectivity reported hypoactivation in the vermis III, VI, VII,  
299 and VIII, along with a negative correlation between the vermis and time processing abilities in

300 individuals with SZ (62). Moreover, divided attention (region 5) in task-based and Visual B  
301 (region 2) and limbic A (region 10) in resting state are highlighted for features in median.

302 Like SZ (63), ASD is a complex neurodevelopmental condition (12) involving a range  
303 of clinical characteristics, including repetitive behaviors, restricted interests, and difficulties in  
304 social interaction and communication (64). The substantial heterogeneity in clinical  
305 characteristics and severity, ranging from the highest functioning form of autism to those  
306 requiring substantial support in their everyday life, makes it challenging to demarcate a  
307 common neurobiological underpinning (65). Previous studies did not provide conclusive  
308 associations between cerebellar volume and ASD (66). Perhaps related to this, in this study,  
309 ASD was significantly associated with variance, i.e. the spread of the deviations within a region.  
310 Analyses of feature importance in significant ASD model highlighted Left VIIB and Left Crus  
311 II as well as the narrative, emotion and language processing region 7 in the task-based atlas. In  
312 addition to median and extreme deviations, variability within cerebellar sub-regions, especially  
313 those connected to higher cognitive areas, could thus be a relevant imaging-based marker of  
314 ASD. Left VIIB of the anatomical atlas and the region 7 of the task-based atlas overlaps in  
315 ASD. These regions of Crus I-II and lobules VIIB are densely connected to the prefrontal and  
316 parietal cortices for higher level processes through cerebello-thalamo-cortico-pontine  
317 cerebellar circuits (67).

318 Previous studies have consistently reported good classification of dementia based on  
319 imaging data (AUROC ranging from 0.904 to 0.920) (3). Thus, our lack of any significant  
320 predictive models for this condition was somewhat surprising (but note that effects of MCI and  
321 AD were also relatively small in our previous study (17)). While one must be careful in  
322 interpreting null-findings, this lack of any significant effects in a moderately large sample of  
323 baseline AD patients nonetheless suggests that the cerebellum is relatively spared (68,69). On  
324 the other hand, in both typical aging and AD, grey matter loss in the cerebellum's Crus I-II and

325 lobule VI is observed, with typical aging showing a bilateral decline and AD in the right  
326 hemisphere (70). The cerebellum remains under-studied, and we need to explore how aging  
327 and AD pathology contribute to cerebellar atrophy.

328         There are limitations to consider in our study. First, harmonizing behavioral, cognitive,  
329 genetic, phenotypic, lifestyle, symptomatology, and medical history data across various  
330 datasets poses significant challenges, especially when aiming for a large sample size essential  
331 for assessing generalizability. We assembled a group of participants for whom we had access  
332 to essential information such as diagnosis, sex, age, scanning site, and brain imaging data.  
333 General limitations in machine learning such as sample size (71) should be taken into  
334 consideration when interpreting the current findings. Next, accurately classifying complex  
335 clinical conditions is challenging due to the intrinsic heterogeneity of these conditions, which  
336 manifests as a wide array of symptoms and genetic variations. Some individuals may exhibit  
337 resilience due to genetic or lifestyle factors, which can complicate accurate predictions (72).  
338 Further, the existence of sub-groups within heterogeneous conditions, such as ASD,  
339 complicates the interpretation of performance metrics of prediction models.  
340 Neurodevelopmental changes raise concerns about the appropriateness of applying adult  
341 template space and atlases to younger children and adolescents (73). The cerebellum's distinct  
342 position within the skull and its intricate folding pattern also present challenges in obtaining  
343 precise MRI data. Finally, an AUROC value in the range of 0.7 to 0.8 can be deemed acceptable  
344 for certain clinical applications (74), indicating fair discrimination which includes the range of  
345 our model. However, for many clinical scenarios, this may not suffice, as values from 0.8 to  
346 0.9 are generally regarded as appropriate (75). Future research efforts should aim to address  
347 these limitations and further enhance our understanding of predictive models.

348

349 **Conclusion**

350 This study tested the value of cerebellar-derived features for predictions of five mental and  
351 neurological conditions. The analysis revealed moderate prediction performance for ASD and  
352 SZ, with strongest contributions from posterior cerebellar regions.

353

#### 354 **Data availability**

355 In this study, we used brain imaging from ABIDE, ADNI, AIBL, DEMGEN, and TOP. The  
356 cerebellar normative models from this work are available on via PCNportal (76):  
357 <https://pcnportal.dccn.nl/>.

358

#### 359 **Code availability**

360 All code used in this work is available at FreeSurfer (<https://surfer.nmr.mgh.harvard.edu>), FSL  
361 (<https://fsl.fmrib.ox.ac.uk/fsl/fslwiki/FslInstallation>), ACAPULCO  
362 (<https://gitlab.com/shuohan/acapulco>), and SUIT (<https://github.com/jdiedrichsen/suit>). Code  
363 for normative model is available as open-source python package, Predictive Clinical  
364 Neuroscience (PCN) toolkit (<https://github.com/amarquand/PCNtoolkit>). Further code is  
365 forked to or published on <https://github.com/MHM-lab>.

366

#### 367 **Ethics of the study**

368 These are analyses of publicly and privately available data. Description of informed consent  
369 and other ethical procedures is extensively described in each study, referenced in the  
370 manuscript. The data were stored and analyzed using University of Oslo's secure platform,  
371 *Services for sensitive data* (TSD), in compliance with Norwegian privacy regulations.

372

#### 373 **Funding**

374 The work was supported by the South-Eastern Norway Regional Health Authority (2021040,  
375 supporting M.K. & T.M.; 2018037, 2018076, 2019101, 2021070, 2023012, 500189), DFG  
376 Emmy Noether 513851350 (supporting T.W.), NordForsk (#164218), the Research Council of  
377 Norway (249795, 248238, 276082, 286838, 288083, 323951, 324499), Stiftelsen Kristian  
378 Gerhard Jebsen, ERA-Net Cofund through the ERA PerMed project IMPLEMENT, and the  
379 European Research Council under the European Union’s Horizon 2020 research and  
380 Innovation program (ERC StG Grant No. 802998). A.F.M gratefully acknowledges funding  
381 from the European Research Council (‘MENTALPRECISION’ 101001118) and from the  
382 Raynor Foundation. The funders had no role in conception of the study as well as the analyses  
383 and/or interpretations of the results.

384

### 385 **Conflict of Interest Disclosures**

386 O.A.A. has received speaker fees from Lundbeck, Janssen, Otsuka, and Sunovion and is a  
387 consultant to Cortechs.ai and Precision-Health.ai. E.H.L. has received speaker fees from  
388 Lundbeck, and is the CTO and shareholder of baba.vision. L.T.W. and T.W. are shareholders  
389 of baba.vision. KP contributed to clinical trials for Roche (BN29553) and Novo Nordisk  
390 (NN6535-4730), outside the submitted work. The other authors report no competing interests.

391

### 392 **Acknowledgements**

393 We are grateful to all the individuals who participated in the studies and acknowledge the  
394 contributions of the clinicians and researchers involved in the recruitment and assessment of  
395 participants for making this work possible. We want to acknowledge the Norwegian registry  
396 of persons assessed for cognitive symptoms (NorCog), for providing access to patient data. We  
397 performed this work on the Services for sensitive data (TSD), University of Oslo, Norway,



398 with resources provided by UNINETT Sigma2 - the National Infrastructure for High-  
399 Performance Computing and Data Storage in Norway.

400 Data collection and sharing for this project was funded by the Alzheimer's Disease  
401 Neuroimaging Initiative (ADNI) (National Institutes of Health Grant U01 AG024904) and  
402 DOD ADNI (Department of Defense award number W81XWH-12-2-0012). ADNI is funded  
403 by the National Institute on Aging, the National Institute of Biomedical Imaging and  
404 Bioengineering, and through generous contributions from the following: AbbVie, Alzheimer's  
405 Association; Alzheimer's Drug Discovery Foundation; Araclon Biotech; BioClinica, Inc.;  
406 Biogen; Bristol-Myers Squibb Company; CereSpir, Inc.; Cogstate; Eisai Inc.; Elan  
407 Pharmaceuticals, Inc.; Eli Lilly and Company; EuroImmun; F. Hoffmann-La Roche Ltd and  
408 its affiliated company Genentech, Inc.; Fujirebio; GE Healthcare; IXICO Ltd.; Janssen  
409 Alzheimer Immunotherapy Research & Development, LLC.; Johnson & Johnson  
410 Pharmaceutical Research & Development LLC.; Lumosity; Lundbeck; Merck & Co., Inc.;  
411 Meso Scale Diagnostics, LLC.; NeuroRx Research; Neurotrack Technologies; Novartis  
412 Pharmaceuticals Corporation; Pfizer Inc.; Piramal Imaging; Servier; Takeda Pharmaceutical  
413 Company; and Transition Therapeutics. The Canadian Institutes of Health Research is  
414 providing funds to support ADNI clinical sites in Canada. Private sector contributions are  
415 facilitated by the Foundation for the National Institutes of Health ([www.fnih.org](http://www.fnih.org)). The grantee  
416 organization is the Northern California Institute for Research and Education, and the study is  
417 coordinated by the Alzheimer's Therapeutic Research Institute at the University of Southern  
418 California. ADNI data are disseminated by the Laboratory for Neuro Imaging at the University  
419 of Southern California. Also, data used in preparation of this article were obtained from the  
420 Australian Imaging Biomarkers and Lifestyle Study of Ageing (AIBL) databases  
421 ([adni.loni.usc.edu](http://adni.loni.usc.edu)).

422

## 423 Authorship Contributions

424 T.M., T.W., and M.K. originally conceived of the project. M.K., N.S., T.W., T.M., and E.H.L.  
425 performed the analyses. M.K. T.W. T.M. wrote the initial draft of the manuscript. O.A., G.R.,  
426 K.P., D.A., G.S., N.E.S., O.B.S., A.F.M., C.F.B., D.A., T.U., T.W. and L.W. contributed to  
427 data curation. All authors discussed the results and contributed to the final manuscript.

428  
429

## 430 References

- 431 1. Chen J, Patil KR, Yeo BTT, Eickhoff SB (2023): Leveraging Machine Learning for  
432 Gaining Neurobiological and Nosological Insights in Psychiatric Research. *Biol*  
433 *Psychiatry* 93: 18–28.
- 434 2. Meehan AJ, Lewis SJ, Fazel S, Fusar-Poli P, Steyerberg EW, Stahl D, Danese A (2022):  
435 Clinical prediction models in psychiatry: a systematic review of two decades of  
436 progress and challenges [no. 6]. *Mol Psychiatry* 27: 2700–2708.
- 437 3. Leonardsen EH, Persson K, Grødem E, Dinsdale N, Schellhorn T, Roe JM, *et al.* (2024):  
438 Constructing personalized characterizations of structural brain aberrations in patients  
439 with dementia using explainable artificial intelligence. *Npj Digit Med* 7: 1–14.
- 440 4. Rashid B, Calhoun V (2020): Towards a brain-based predictome of mental illness. *Hum*  
441 *Brain Mapp* 41: 3468–3535.
- 442 5. Wolfers T, Buitelaar JK, Beckmann CF, Franke B, Marquand AF (2015): From estimating  
443 activation locality to predicting disorder: A review of pattern recognition for  
444 neuroimaging-based psychiatric diagnostics. *Neurosci Biobehav Rev* 57: 328–349.
- 445 6. Zhu Y, Maikusa N, Radua J, Sämann PG, Fusar-Poli P, Agartz I, *et al.* (2024): Using brain  
446 structural neuroimaging measures to predict psychosis onset for individuals at clinical  
447 high-risk. *Mol Psychiatry* 29: 1465–1477.
- 448 7. Parvizi J (2009): Corticocentric myopia: old bias in new cognitive sciences. *Trends Cogn*  
449 *Sci* 13: 354–359.

- 450 8. Hughes DE, Kunitoki K, Elyounssi S, Luo M, Bazer OM, Hopkinson CE, *et al.* (2023):  
451 Genetic patterning for child psychopathology is distinct from that for adults and  
452 implicates fetal cerebellar development [no. 6]. *Nat Neurosci* 26: 959–969.
- 453 9. Schmahmann JD (2016): Cerebellum in Alzheimer’s disease and frontotemporal dementia:  
454 not a silent bystander. *Brain* 139: 1314–1318.
- 455 10. Moberget T, Doan NT, Alnæs D, Kaufmann T, Córdova-Palomera A, Lagerberg TV, *et*  
456 *al.* (2018): Cerebellar volume and cerebellocerebral structural covariance in  
457 schizophrenia: a multisite mega-analysis of 983 patients and 1349 healthy controls  
458 [no. 6]. *Mol Psychiatry* 23: 1512–1520.
- 459 11. D’Mello AM, Stoodley CJ (2015): Cerebro-cerebellar circuits in autism spectrum  
460 disorder. *Front Neurosci* 9. Retrieved February 10, 2023, from  
461 <https://www.frontiersin.org/articles/10.3389/fnins.2015.00408>
- 462 12. Stoodley CJ (2016): The Cerebellum and Neurodevelopmental Disorders. *Cerebellum* 15:  
463 34–37.
- 464 13. van der Heijden ME, Gill JS, Sillitoe RV (2021): Abnormal Cerebellar Development in  
465 Autism Spectrum Disorders. *Dev Neurosci* 43: 181–190.
- 466 14. Schmahmann JD (2004): Disorders of the Cerebellum: Ataxia, Dysmetria of Thought,  
467 and the Cerebellar Cognitive Affective Syndrome. *J Neuropsychiatry Clin Neurosci*  
468 16: 367–378.
- 469 15. Schmahmann JD (2019): The cerebellum and cognition. *Neurosci Lett* 688: 62–75.
- 470 16. Schmahmann JD (2021): Chapter 6 - Emotional disorders and the cerebellum:  
471 Neurobiological substrates, neuropsychiatry, and therapeutic implications. In:  
472 Heilman KM, Nadeau SE, editors. *Handbook of Clinical Neurology*, vol. 183.  
473 Elsevier, pp 109–154.

- 474 17. Kim M, Leonardsen E, Rutherford S, Selbæk G, Persson K, Steen NE, *et al.* (2024):  
475 Mapping cerebellar anatomical heterogeneity in mental and neurological illnesses.  
476 *Nat Ment Health* 1–12.
- 477 18. Buckner RL, Krienen FM, Castellanos A, Diaz JC, Yeo BTT (2011): The organization of  
478 the human cerebellum estimated by intrinsic functional connectivity. *J Neurophysiol*  
479 106: 2322–2345.
- 480 19. King M, Hernandez-Castillo CR, Poldrack RA, Ivry RB, Diedrichsen J (2019):  
481 Functional boundaries in the human cerebellum revealed by a multi-domain task  
482 battery. *Nat Neurosci* 22: 1371–1378.
- 483 20. Ho DE, Imai K, King G, Stuart EA (2011): MatchIt : Nonparametric Preprocessing for  
484 Parametric Causal Inference. *J Stat Softw* 42. <https://doi.org/10.18637/jss.v042.i08>
- 485 21. Ségonne F, Dale AM, Busa E, Glessner M, Salat D, Hahn HK, Fischl B (2004): A hybrid  
486 approach to the skull stripping problem in MRI. *NeuroImage* 22: 1060–1075.
- 487 22. Jenkinson M, Beckmann CF, Behrens TEJ, Woolrich MW, Smith SM (2012): FSL.  
488 *NeuroImage* 62: 782–790.
- 489 23. Jenkinson M, Smith S (2001): A global optimisation method for robust affine registration  
490 of brain images. *Med Image Anal* 5: 143–156.
- 491 24. Han S, An Y, Carass A, Prince JL, Resnick SM (2020): Longitudinal analysis of regional  
492 cerebellum volumes during normal aging. *NeuroImage* 220: 117062.
- 493 25. Tustison NJ, Avants BB, Cook PA, Zheng Y, Egan A, Yushkevich PA, Gee JC (2010):  
494 N4ITK: improved N3 bias correction. *IEEE Trans Med Imaging* 29: 1310–1320.
- 495 26. Fonov V, Evans AC, Botteron K, Almli CR, McKinsty RC, Collins DL, Brain  
496 Development Cooperative Group (2011): Unbiased average age-appropriate atlases  
497 for pediatric studies. *NeuroImage* 54: 313–327.

- 498 27. Carass A, Cuzzocreo JL, Han S, Hernandez-Castillo CR, Rasser PE, Ganz M, *et al.*  
499 (2018): Comparing fully automated state-of-the-art cerebellum parcellation from  
500 magnetic resonance images. *NeuroImage* 183: 150–172.
- 501 28. Kerestes R, Han S, Balachander S, Hernandez-Castillo C, Prince JL, Diedrichsen J,  
502 Harding IH (2022): A Standardized Pipeline for Examining Human Cerebellar Grey  
503 Matter Morphometry using Structural Magnetic Resonance Imaging. *J Vis Exp JoVE*.  
504 <https://doi.org/10.3791/63340>
- 505 29. Diedrichsen J (2006): A spatially unbiased atlas template of the human cerebellum.  
506 *NeuroImage* 33: 127–138.
- 507 30. Diedrichsen J, Balsters JH, Flavell J, Cussans E, Ramnani N (2009): A probabilistic MR  
508 atlas of the human cerebellum. *NeuroImage* 46: 39–46.
- 509 31. Marquand AF, Kia SM, Zabihi M, Wolfers T, Buitelaar JK, Beckmann CF (2019):  
510 Conceptualizing mental disorders as deviations from normative functioning. *Mol*  
511 *Psychiatry* 24: 1415–1424.
- 512 32. Rutherford S, Kia SM, Wolfers T, Frazz C, Zabihi M, Dinga R, *et al.* (2022): The  
513 normative modeling framework for computational psychiatry. *Nat Protoc* 17: 1711–  
514 1734.
- 515 33. Rios G, Tobar F (2019): Compositionally-warped Gaussian processes. *Neural Netw* 118:  
516 235–246.
- 517 34. Frazz C, Dinga R, Beckmann CF, Marquand AF, Andre Marquand (2021): Warped  
518 Bayesian Linear Regression for Normative Modelling of Big Data. *bioRxiv*.  
519 <https://doi.org/10.1101/2021.04.05.438429>
- 520 35. Dinga R, Frazz CJ, Bayer JMM, Kia SM, Beckmann CF, Marquand AF (2021, June 14):  
521 Normative modeling of neuroimaging data using generalized additive models of  
522 location scale and shape. *bioRxiv*, p 2021.06.14.448106.

- 523 36. Kia SM, Huijsdens H, Rutherford S, Dinga R, Wolfers T, Mennes M, *et al.* (2021, May  
524 30): Federated Multi-Site Normative Modeling using Hierarchical Bayesian  
525 Regression. *bioRxiv*, p 2021.05.28.446120.
- 526 37. Bayer JMM, Dinga R, Kia SM, Kottaram AR, Wolfers T, Lv J, *et al.* (2021, May 30):  
527 Accommodating site variation in neuroimaging data using normative and hierarchical  
528 Bayesian models. *bioRxiv*, p 2021.02.09.430363.
- 529 38. Yeo BTT, Krienen FM, Sepulcre J, Sabuncu MR, Lashkari D, Hollinshead M, *et al.*  
530 (2011): The organization of the human cerebral cortex estimated by intrinsic  
531 functional connectivity. *J Neurophysiol* 106: 1125–1165.
- 532 39. Alnæs D, Kaufmann T, van der Meer D, Córdova-Palomera A, Rokicki J, Moberget T, *et*  
533 *al.* (2019): Brain Heterogeneity in Schizophrenia and Its Association With Polygenic  
534 Risk. *JAMA Psychiatry* 76: 739–748.
- 535 40. Brugger SP, Howes OD (2017): Heterogeneity and Homogeneity of Regional Brain  
536 Structure in Schizophrenia: A Meta-analysis. *JAMA Psychiatry* 74: 1104–1111.
- 537 41. Rutherford S, Barkema P, Tso IF, Sripada C, Beckmann CF, Ruhe HG, Marquand AF  
538 (2023): Evidence for embracing normative modeling ((C. I. Baker, T. Constable, & O.  
539 Esteban, editors)). *eLife* 12: e85082.
- 540 42. Wolfers T, Doan NT, Kaufmann T, Alnæs D, Moberget T, Agartz I, *et al.* (2018):  
541 Mapping the Heterogeneous Phenotype of Schizophrenia and Bipolar Disorder Using  
542 Normative Models. *JAMA Psychiatry* 75: 1146–1155.
- 543 43. Zabihi M, Oldehinkel M, Wolfers T, Frouin V, Goyard D, Loth E, *et al.* (2018):  
544 Dissecting the Heterogeneous Cortical Anatomy of Autism Spectrum Disorder Using  
545 Normative Models. *Biol Psychiatry Cogn Neurosci Neuroimaging* 4: 567–578.

- 546 44. Pedregosa F, Varoquaux G, Gramfort A, Michel V, Thirion B, Grisel O, *et al.* (2018, June  
547 5): Scikit-learn: Machine Learning in Python [no. arXiv:1201.0490]. arXiv.  
548 <https://doi.org/10.48550/arXiv.1201.0490>
- 549 45. Chen T, Guestrin C (2016, March 1): XGBoost: A Scalable Tree Boosting System. *arXiv*  
550 *E-Prints*. <https://doi.org/10.48550/arXiv.1603.02754>
- 551 46. Rokicki J, Wolfers T, Nordhøy W, Tesli N, Quintana DS, Alnæs D, *et al.* (2021):  
552 Multimodal imaging improves brain age prediction and reveals distinct abnormalities  
553 in patients with psychiatric and neurological disorders. *Hum Brain Mapp* 42: 1714–  
554 1726.
- 555 47. Tavares V, Vassos E, Marquand A, Stone J, Valli I, Barker GJ, *et al.* (2023): Prediction  
556 of transition to psychosis from an at-risk mental state using structural neuroimaging,  
557 genetic, and environmental data. *Front Psychiatry* 13: 1086038.
- 558 48. Walther S (2015): Psychomotor symptoms of schizophrenia map on the cerebral motor  
559 circuit. *Psychiatry Res Neuroimaging* 233: 293–298.
- 560 49. Walther S, Strik W (2012): Motor Symptoms and Schizophrenia. *Neuropsychobiology* 66:  
561 77–92.
- 562 50. Heath RG, Franklin DE, Walker CF, Keating JW (1982): Cerebellar vermal atrophy in  
563 psychiatric patients. *Biol Psychiatry* 17: 569–583.
- 564 51. Jacobsen LK, Giedd JN, Berquin PC, Krain AL, Hamburger SD, Kumra S, Rapoport JL  
565 (1997): Quantitative morphology of the cerebellum and fourth ventricle in childhood-  
566 onset schizophrenia. *Am J Psychiatry* 154: 1663–1669.
- 567 52. Picard H, Amado I, Mouchet-Mages S, Olié J-P, Krebs M-O (2008): The Role of the  
568 Cerebellum in Schizophrenia: an Update of Clinical, Cognitive, and Functional  
569 Evidences. *Schizophr Bull* 34: 155–172.

- 570 53. Brady RO, Gonsalvez I, Lee I, Öngür D, Seidman LJ, Schmahmann JD, *et al.* (2019):  
571 Cerebellar-Prefrontal Network Connectivity and Negative Symptoms in  
572 Schizophrenia. *Am J Psychiatry* 176: 512–520.
- 573 54. Metoki A, Wang Y, Olson IR (2022): The Social Cerebellum: A Large-Scale  
574 Investigation of Functional and Structural Specificity and Connectivity. *Cereb Cortex*  
575 32: 987–1003.
- 576 55. Clausi S, Olivito G, Lupo M, Siciliano L, Bozzali M, Leggio M (2019): The Cerebellar  
577 Predictions for Social Interactions: Theory of Mind Abilities in Patients With  
578 Degenerative Cerebellar Atrophy. *Front Cell Neurosci* 12: 510.
- 579 56. Van Overwalle F, Manto M, Cattaneo Z, Clausi S, Ferrari C, Gabrieli JDE, *et al.* (2020):  
580 Consensus Paper: Cerebellum and Social Cognition. *The Cerebellum* 19: 833–868.
- 581 57. Blatt GJ, Oblak AL, Schmahmann JD (2013): Cerebellar Connections with Limbic  
582 Circuits: Anatomy and Functional Implications. In: Manto M, Schmahmann JD, Rossi  
583 F, Gruol DL, Koibuchi N, editors. *Handbook of the Cerebellum and Cerebellar*  
584 *Disorders*. Dordrecht: Springer Netherlands, pp 479–496.
- 585 58. Nopoulos PC, Ceilley JW, Gailis EA, Andreasen NC (1999): An MRI study of cerebellar  
586 vermis morphology in patients with schizophrenia: evidence in support of the  
587 cognitive dysmetria concept. *Biol Psychiatry* 46: 703–711.
- 588 59. Leslie AC, Ward MP, Dobyys WB (2024): Undifferentiated psychosis or schizophrenia  
589 associated with vermis-predominant cerebellar hypoplasia. *Am J Med Genet A* 194:  
590 e63416.
- 591 60. Sang L, Qin W, Liu Y, Han W, Zhang Y, Jiang T, Yu C (2012): Resting-state functional  
592 connectivity of the vermal and hemispheric subregions of the cerebellum with both  
593 the cerebral cortical networks and subcortical structures. *NeuroImage* 61: 1213–1225.



- 594 61. Hutton S, Kennard C (1998): Oculomotor abnormalities in schizophrenia. *Neurology* 50:  
595 604–609.
- 596 62. Lošák J, Hüttlová J, Lipová P, Mareček R, Bareš M, Filip P, *et al.* (2016): Predictive  
597 Motor Timing and the Cerebellar Vermis in Schizophrenia: An fMRI Study.  
598 *Schizophr Bull* 42: 1517–1527.
- 599 63. Moberget T, Alnæs D, Kaufmann T, Doan NT, Córdova-Palomera A, Norbom LB, *et al.*  
600 (2019): Cerebellar Gray Matter Volume Is Associated With Cognitive Function and  
601 Psychopathology in Adolescence. *Biol Psychiatry* 86: 65–75.
- 602 64. American Psychiatric Association (2013): *Diagnostic and Statistical Manual of Mental*  
603 *Disorders*, Fifth Edition. American Psychiatric Association.  
604 <https://doi.org/10.1176/appi.books.9780890425596>
- 605 65. Verhoeff B (2015): Fundamental challenges for autism research: the science–practice  
606 gap, demarcating autism and the unsuccessful search for the neurobiological basis of  
607 autism. *Med Health Care Philos* 18: 443–447.
- 608 66. Traut N, Beggiano A, Bourgeron T, Delorme R, Rondi-Reig L, Paradis A-L, Toro R  
609 (2018): Cerebellar Volume in Autism: Literature Meta-analysis and Analysis of the  
610 Autism Brain Imaging Data Exchange Cohort. *Biol Psychiatry* 83: 579–588.
- 611 67. Becker EBE, Stoodley CJ (2013): Chapter One - Autism Spectrum Disorder and the  
612 Cerebellum. In: Konopka G, editor. *International Review of Neurobiology*, vol. 113.  
613 Academic Press, pp 1–34.
- 614 68. Bernard JA, Seidler RD (2014): Moving forward: age effects on the cerebellum underlie  
615 cognitive and motor declines. *Neurosci Biobehav Rev* 42: 193–207.
- 616 69. Liang KJ, Carlson ES (2019): Resistance, Vulnerability and Resilience: A Review of the  
617 Cognitive Cerebellum in Aging and Neurodegenerative Diseases. *Neurobiol Learn*  
618 *Mem* S1074-7427(19)30005-X.

- 619 70. Gellersen HM, Guell X, Sami S (2021): Differential vulnerability of the cerebellum in  
620 healthy ageing and Alzheimer’s disease. *NeuroImage Clin* 30: 102605.
- 621 71. Arbabshirani MR, Plis S, Sui J, Calhoun VD (2017): Single subject prediction of brain  
622 disorders in neuroimaging: Promises and pitfalls. *NeuroImage* 145: 137–165.
- 623 72. Venkatraghavan V, Voort SR van der, Bos D, Smits M, Barkhof F, Niessen WJ, *et al.*  
624 (2023): Computer-Aided Diagnosis and Prediction in Brain Disorders. In: Colliot O,  
625 editor. *Machine Learning for Brain Disorders*. New York, NY: Springer US, pp 459–  
626 490.
- 627 73. Gaiser C, van der Vliet R, de Boer AAA, Donchin O, Berthet P, Devenyi GA, *et al.*  
628 (2024): Population-wide cerebellar growth models of children and adolescents. *Nat*  
629 *Commun* 15: 2351.
- 630 74. Mandrekar JN (2010): Receiver Operating Characteristic Curve in Diagnostic Test  
631 Assessment. *J Thorac Oncol* 5: 1315–1316.
- 632 75. Zarogianni E, Storkey AJ, Borgwardt S, Smieskova R, Studerus E, Riecher-Rössler A,  
633 Lawrie SM (2019): Individualized prediction of psychosis in subjects with an at-risk  
634 mental state. *Schizophr Res* 214: 18–23.
- 635 76. Barkema P, Rutherford S, Lee H-C, Kia SM, Savage H, Beckmann C, Marquand A  
636 (2023): Predictive Clinical Neuroscience Portal (PCNportal): instant online access to  
637 research-grade normative models for clinical neuroscientists. *Wellcome Open Res* 8:  
638 326.
- 639  
640  
641

642 **Table 1.** Matched sample description and demographics

|               |                           | N (Participants) | N (Scanners) | Age (Mean, S.D.) | Sex (%F: %M) |
|---------------|---------------------------|------------------|--------------|------------------|--------------|
| Matched<br>HC | Alzheimer’s Disease       | 116              | 13           | 71.72(7.12)      | 55:45        |
|               | ASD                       | 317              | 25           | 15.96(7.45)      | 17:83        |
|               | Bipolar Disorder          | 238              | 3            | 33.06(10.50)     | 55:45        |
|               | Mild Cognitive Impairment | 122              | 3            | 65.62(9.91)      | 42:58        |
|               | Schizophrenia             | 195              | 3            | 30.13 (8.15)     | 41:59        |
| Clinical      | Alzheimer’s Disease       | 116              | 13           | 73.11(7.60)      | 55:45        |
|               | ASD                       | 317              | 25           | 12.35(4.42)      | 17:83        |
|               | Bipolar Disorder          | 238              | 3            | 31.61(11.40)     | 55:45        |
|               | Mild Cognitive Impairment | 122              | 3            | 67.25(9.27)      | 42:58        |
|               | Schizophrenia             | 195              | 3            | 28.29 (9.45)     | 41:59        |

643  
644  
645  
646  
647  
648  
649  
650  
651  
652  
653  
654  
655  
656  
657  
658  
659  
660  
661

662 **Figure Captions**

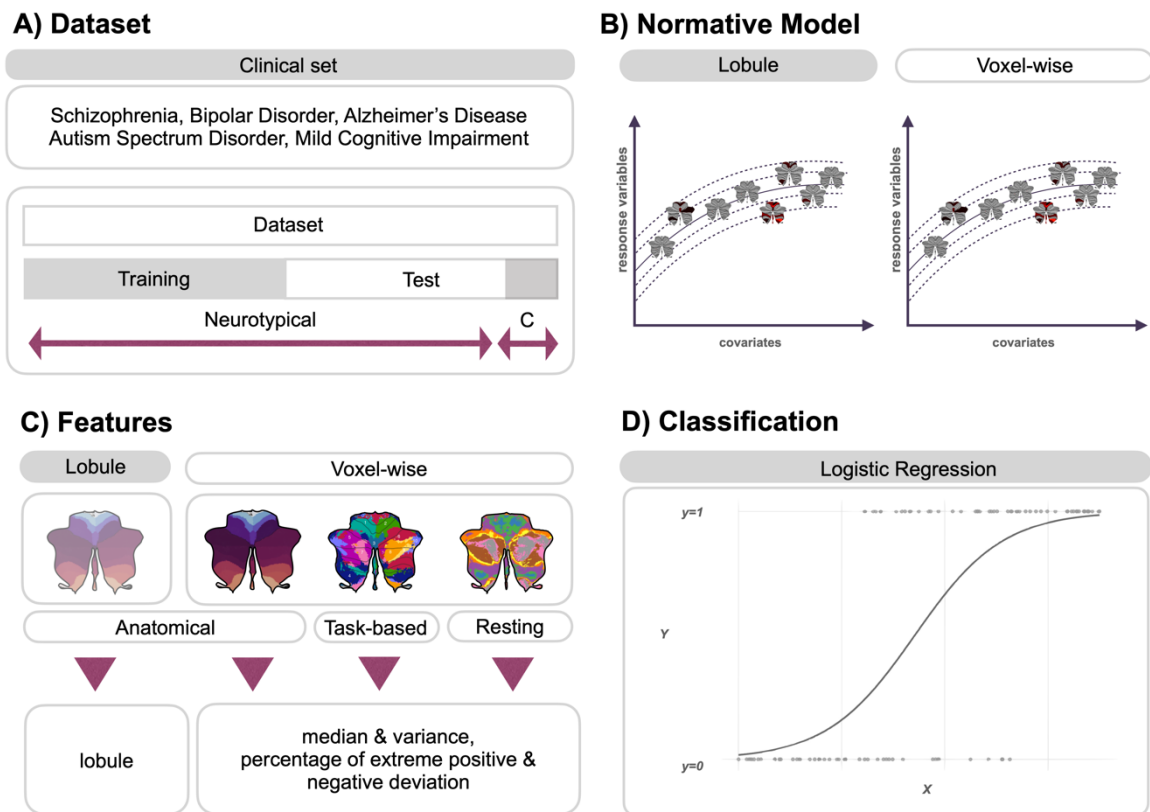

663  
 664 **Figure 1. Overview of Predicting Mental and Neurological Illnesses.** (A) The study  
 665 incorporated five clinical datasets. (B) Individuals without a diagnosis were divided into  
 666 training and testing sets to evaluate the cerebellar normative models, which were prepared in  
 667 both lobular and voxel-wise features. (C) The analysis utilized six distinct types of features,  
 668 median, variance, and percentage of extreme positive and negative deviation, alongside lobular  
 669 volume. (D) Logistic regression algorithm was employed to determine the likelihood of a  
 670 clinical diagnosis in an individual.  
 671

### A) Prediction Accuracy

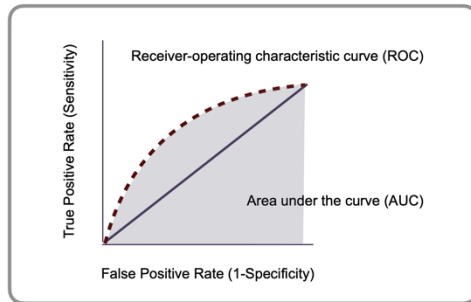

### B) AUROC in anatomical atlas

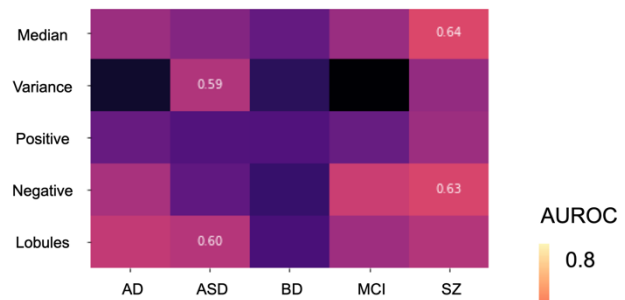

### C) AUROC in task-based atlas

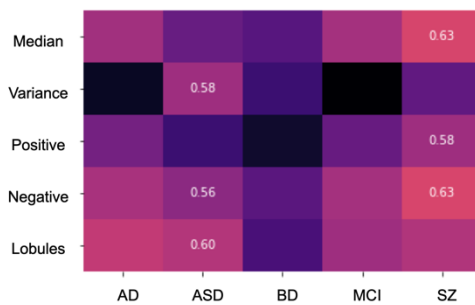

### D) AUROC in resting-connectivity atlas

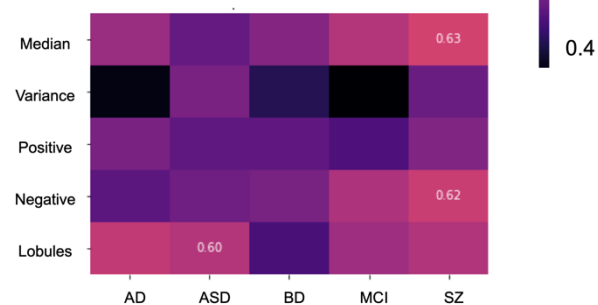

672  
673  
674  
675  
676  
677  
678  
679  
680  
681  
682

**Figure 2. Cerebellar features moderately predict ASD and SZ.** (A) Information from the anatomical atlas (28 regions), task-based (10 regions) or resting-state (17 regions) are compiled into features that were used as predictors by the logistic regression model to make predictions. The area under the receiver operating characters curve (AUROC) serves as an important measure in evaluating the performance of a binary classifier, representing a trade-off between the classifier’s sensitivity (true positive rate) and specificity (true negative rate). The reliability and robustness of the AUROC were assessed by computing it over 1,000 permutations, which aids in determining whether the classifier's performance is statistically significant or due to random chance. (B-D) The values that survived multiple comparison are shown.

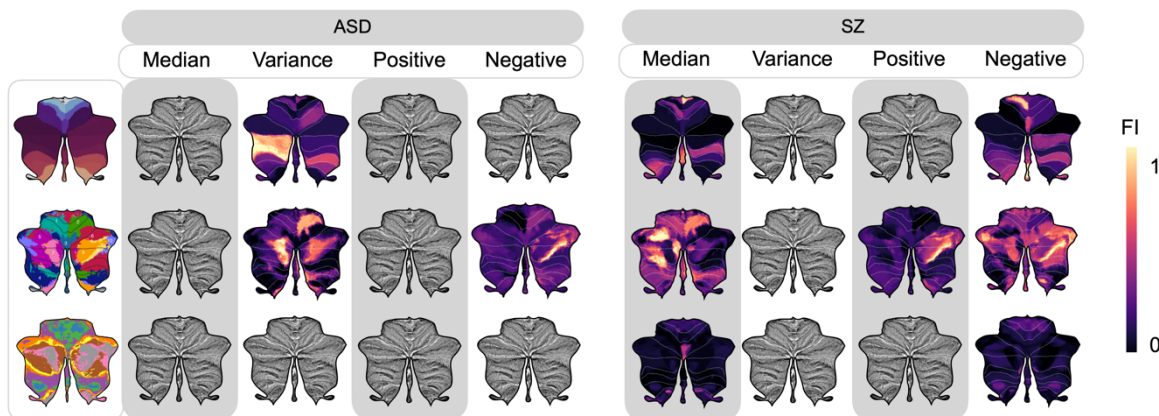

683

684 **Figure 3. Different regions show distinct importance across atlases in ASD and SZ.** The  
685 feature importance (FI) values derived from logistic regression reveal the contribution of each  
686 specific cerebellar region to predictive modelling, relative to average prediction outcomes. FI  
687 values accentuate distinct cerebellar regions with unique predictive capabilities as identified in  
688 lobules, anatomical, task-based, and resting-state atlases through voxel-wise analysis. Features  
689 that remained significant after adjustments for multiple comparisons of AUROC are shown.
